# Supplementary material
Source: publisher site journal article supplement (https://www.dovepress.com/article/235474)
Supplement: Supplementary file 1 [file get_supplementary_file.php]

**Supporting Information:**


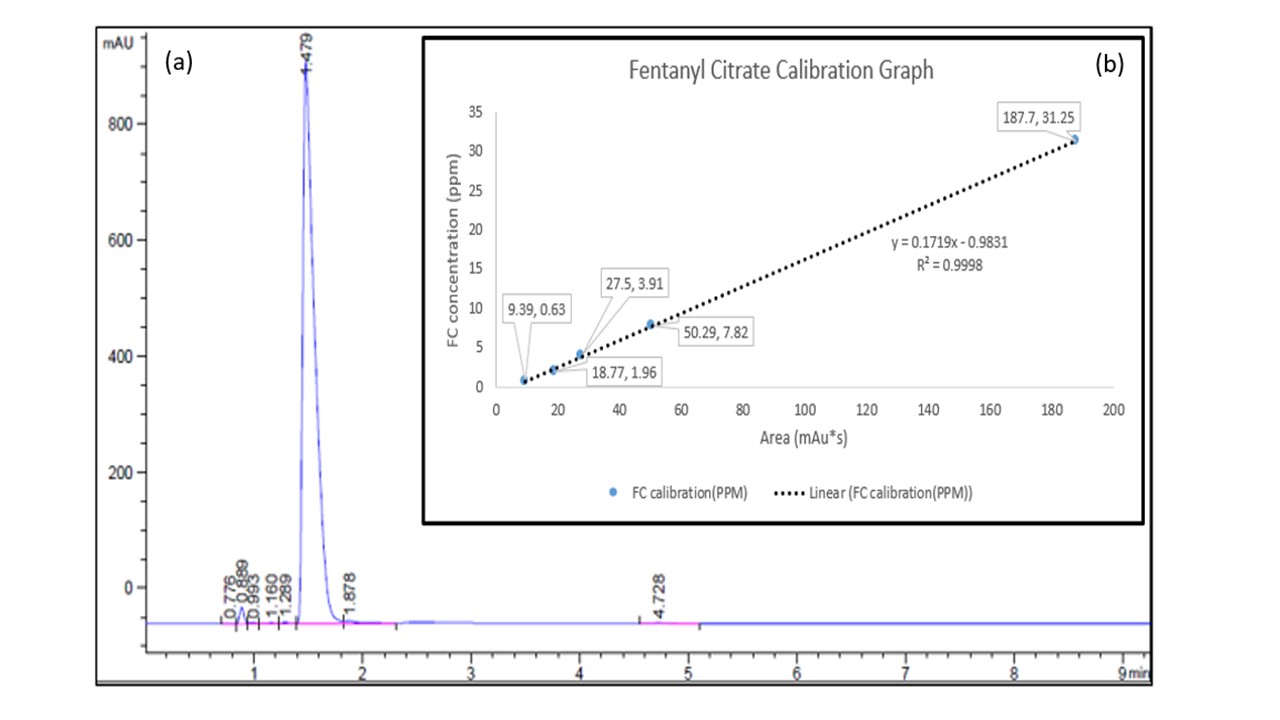


**Figure S1.** (a) HPLC curve of Fentanyl Citrate and (b) calibration curve of drug

**Table S1. ANOVA analysis of statistical test**

| **Secondary Phase** | | **Primary Phase** | | **Parameters**  **Factors** |
| --- | --- | --- | --- | --- |
| Within Groups | Between Groups | Within Groups | Between Groups |
| 4.375 | 6.535 | 4.917 | 17.083 | Sum of Squares |
| 30 | 5 | 30 | 5 | df |
| 0.146 | 1.307 | 0.164 | 3.417 | Mean Square |
|  | 8.962 |  | 20.847 | F |
|  | 0.00 |  | 0.00 | Sig. |
| Std. Deviation | Mean | Std. Deviation | Mean | groups |
| 0.548 | 1.500±0.224 | 0.547 | 2.50±0.224 | Control Group (Group 1) |
| 0.516 | 1.333±0.211 | 0.516 | 2.333±0.211 | NLC 0.005 (Group 2) |
| 0.274 | 0.750±0.111 | 0.492 | 1.417±0.200 | NLC 0.01 (Group 3) |
| 0.258 | 0.667±0.105 | 0.258 | 1.167±0.258 | NLC 0.03 (Group 4) |
| 0.258 | 0.333±0.105 | 0.258 | 0.667±0.105 | NLC 0.06 (Group 5) |
| 0.316 | 0.500±0.129 | 0.204 | 0.917±0.204 | Free Drug 0.06 (Group 6) |
